# Supplementary material
Source: publisher figshare collection journal article supplement (https://acs.figshare.com/ndownloader/files/3581757)

**Figure S1**

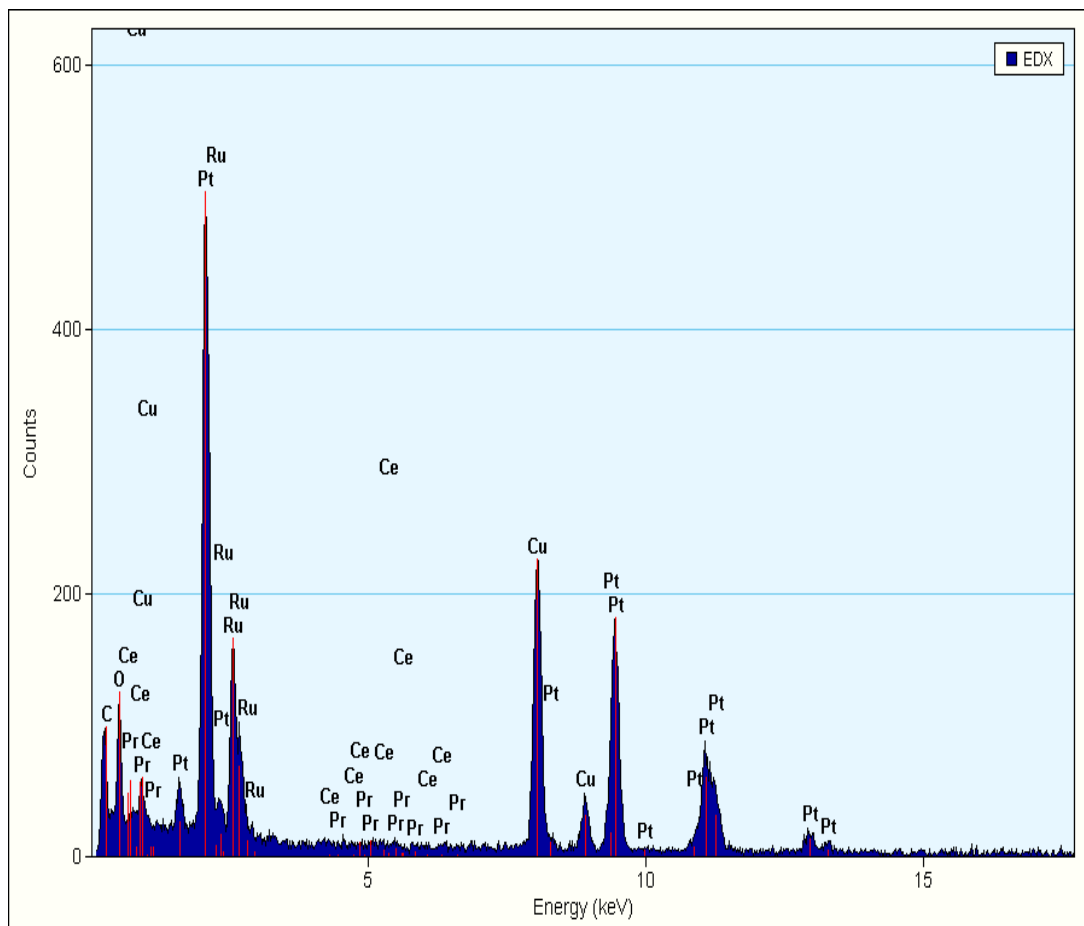

Figure S1. EDS spectrum of catalyst in Figure 2c.

Supplement: Supplementary file 1 [file 3581757]
